# Supplementary material for: Zn interstitials and O vacancies responsible for n-type ZnO: what do the emission spectra reveal?
Source: Royal Society of Chemistry journal article supplement (doi:10.1039/c5ra00355e), 2015-01-01
Supplement: c5ra00355e1.pdf [file c5ra00355e1.pdf]

Electronic Supplementary Information

**Zn interstitials and O vacancies responsible for *n*-type ZnO:  
What does the emission spectra reveal?**

Kingshuk Bandopadhyay and Joy Mitra

School of Physics, Indian Institute of Science Education & Research (IISER) Thiruvananthapuram,  
Kerala 695016, India

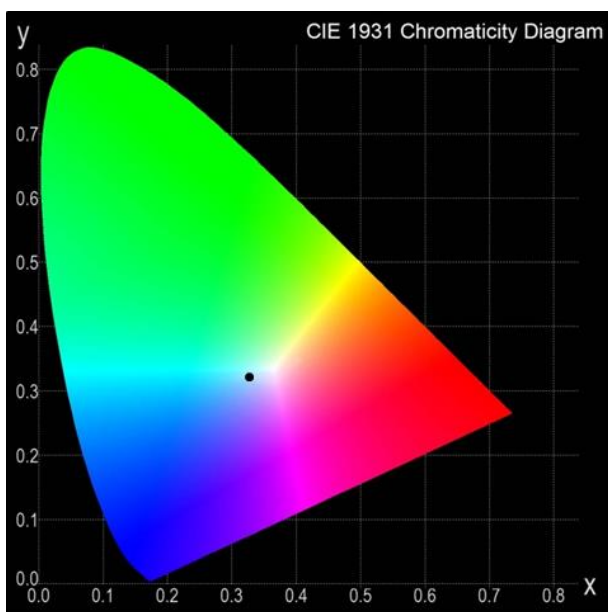

**Figure S1:** Chromaticity coordinate plotted on CIE-1931 diagram for ZnO/ITO emission spectrum at  $\lambda_{\text{exc}} = 375$  nm. The tristimulus values are  $(X, Y, Z) = (104.8, 100.0, 118.7)$  (normalizing for  $Y = 100$ ). Using these values, the calculated xy chromaticity values to be  $x = 0.3239$ ,  $y = 0.3091$ . We converted these chromaticities to the CIE 1960 UCS u and v coordinates:  $u = 0.1690$ ,  $v = 0.3167$ , which gives the correlated color temperature (CCT) = 5980 K on the Planckian locus. This temperature is near to 6504 K, which is the CCT of D-65 illuminant, the CIE standard for daylight.

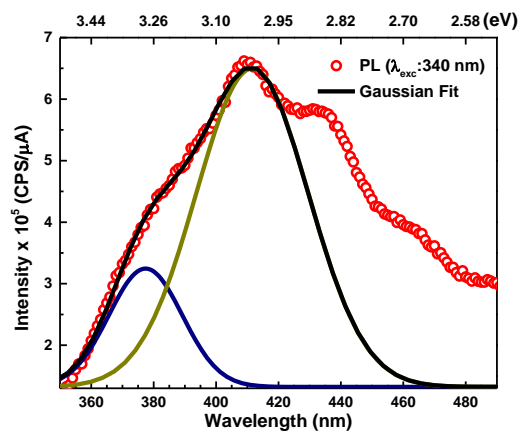

**Figure S2:** Spectral decomposition of the broad NBE PL peak for ZnO/Zn at  $\lambda_{exc} = 340$  nm. UV (377 nm) and violet (411 nm) components and the envelope are shown.

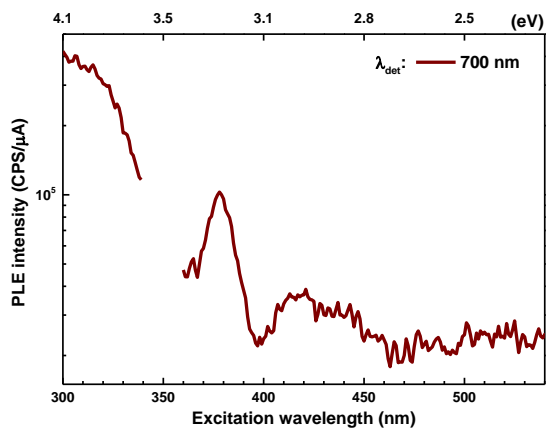

**Figure S3:** PLE spectra at  $\lambda_{det} = 700$  nm for ZnO/Zn nanorods in a range of 300 nm – 540 nm.

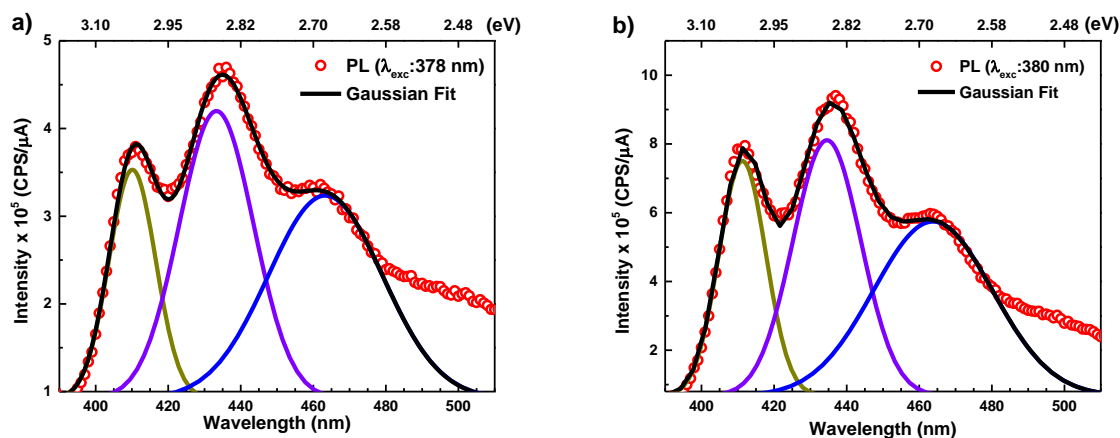

**Figure S4:** Spectral decomposition of the violet-blue PL peaks for a) ZnO/ITO and b) ZnO/Zn.

**Table S1:** Centre wavelength and full-width-half-maximum (FWHM) of UV and violet-blue PL peaks for ZnO/ITO and ZnO/Zn samples.

| ZnO/ITO          |                |           | ZnO/Zn           |                |           |
|------------------|----------------|-----------|------------------|----------------|-----------|
| Peak centre (nm) | FWHM (nm)      | FWHM (eV) | Peak centre (nm) | FWHM (nm)      | FWHM (eV) |
| $378.7 \pm 0.2$  | $15.2 \pm 0.7$ | 0.13      | $377.4 \pm 0.8$  | $27.7 \pm 1.1$ | 0.23      |
| $410.1 \pm 0.1$  | $15.1 \pm 0.2$ | 0.11      | $411.2 \pm 0.1$  | $15.2 \pm 0.2$ | 0.11      |
| $434.7 \pm 0.2$  | $25.6 \pm 0.7$ | 0.16      | $434.5 \pm 0.1$  | $22.0 \pm 0.5$ | 0.14      |
| $463.3 \pm 0.6$  | $37.1 \pm 2.0$ | 0.21      | $463.7 \pm 0.6$  | $38.5 \pm 1.5$ | 0.24      |

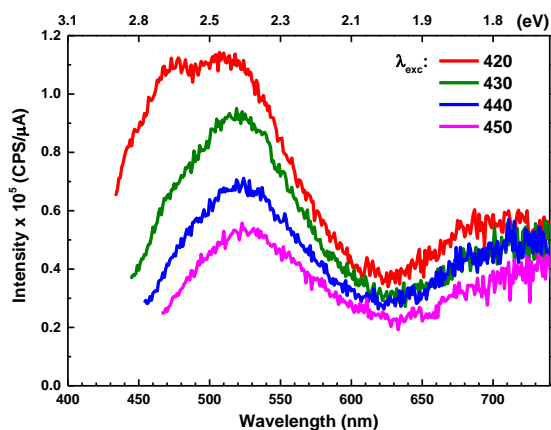

**Figure S5:** Excitation dependent photoluminescence spectra of ZnO/Zn nanorods for higher excitation wavelengths. The spectra show the dominating green emission at 530 nm, which decays with increasing  $\lambda_{exc}$  and the red emission at 700 nm similarly as ZnO/ITO.
